# Supplementary material for: Poly(meta-phenylene oxides) for the design of a tunable, efficient, and reusable catalytic platform
Source: Royal Society of Chemistry journal article supplement (doi:10.1039/c8cc00774h), 2018-01-01

## Supporting Information for

### **Poly(*meta*-phenylene oxides) for the design of a tunable, efficient, and reusable catalytic platform**

R. Hudson,<sup>\*,[a,b,c]</sup> H. R. Zhang,<sup>[b]</sup> A. LoTempio,<sup>[b]</sup> G. Benedetto,<sup>[b]</sup> G. Hamasaka,<sup>[d]</sup> Y. M. A. Yamada,<sup>\*,[a]</sup> J. L. Katz,<sup>\*,[b]</sup> and Y. Uozumi<sup>\*,[a,d]</sup>

<sup>a</sup> RIKEN Center for Sustainable Resource Science, Wako, Saitama 351-0198, Japan

<sup>b</sup> Colby College, Waterville, Maine, 04901, USA

<sup>c</sup> Institut für Chemische Technologie von Materialien, TU Graz, Stremayrgasse 9, 8010 Graz

<sup>d</sup> Institute for Molecular Science, Okazaki, Aichi 444-8787, Japan

Reagents

Instrumentation

Synthesis of Poly(*m*PO)s

Synthesis of Pd@Poly(*m*PO)s

GPC of Poly(*m*PO)s

LogP calculations

### Reagents:

Resorcinol (Aldrich, 99%)  
4,6-dichloropyrimidine (Aldrich, 97%)  
DMSO (Wako)  
K<sub>2</sub>CO<sub>3</sub> (TCI, 99%)  
Acetone (Wako)  
Orcinol (Aldrich, 97%)  
4-(4,6-Dichloro-2-pyrimidyl)morpholine (TCI, 98%)  
4,6-Dichloro-5-(2-methoxyphenoxy)-2,2'-bipyrimidine (TCI, 98%)  
4,7-dichloro-1,10-phenanthroline (Enovation)  
Olivetol (Aldrich, 99%)  
(NH<sub>4</sub>)<sub>2</sub>PdCl<sub>4</sub> (Aldrich, 99.995% trace metal basis)  
Chloroform (Wako)  
Tetrabutylammonium Bromide (TCI, 99%)  
K<sub>3</sub>PO<sub>4</sub> (Aldrich, 97%)  
4-Chlorotoluene (TCI, 98%)  
4-Chlorobenzonitrile (TCI, 98%)  
4-Chlorophenol (TCI, 98%)  
4-Chloroanisole (TCI, 98%)  
4-Chloroaniline (TCI, 99%)  
*trans*-2-Phenylvinylboronic acid (Aldrich, 97%)  
Chlorobenzene (Aldrich, 99.8%)  
Phenylboronic acid (TCI)  
Bromobenzene (TCI, 99%)  
4-Methylphenylboronic acid (TCI)  
4,6-dimethoxypyrimidine (TCI, 98%)  
Iodobenzene (Aldrich, 98%)  
4-iodotoluene (TCI, 99%)  
Butyl acrylate (Aldrich, 99%)  
Styrene (TCI, 99%)

### Instrumentation:

The TEM used for imaging was a JEM-2010F (HR7). Reaction progress and yields were monitored with an Agilent Technologies 6850 series II Network GC System, fitted with a flame ionization detector (GC FID). The SEM used for imaging and elemental mapping was a Hitachi High-Technologies, Miniscope TM3030 Plus fitted with a Bruker, QUANTAX 70 EDS. Palladium was quantified with a Perkin Elmer, NexION 300D ICP-MS. GPC analyses in THF were performed with a WGE GPC running on ParSEC Chromatography V. 5.67. GPC analyses in CHCl<sub>3</sub> were performed with a Japan Analytical Industries GPC with one JAIGEL-2.5H and one JAIGEL-3H column in series.

### Synthesis of Poly(*m*PO)s:

#### **Poly(*m*PO) 1b, 1c, 1d:**

These polymers were synthesized as previously reported.<sup>1</sup>

#### **Poly(*m*PO) 1a:**

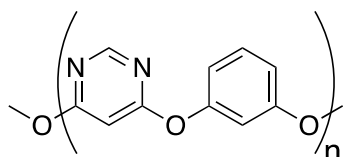

Under an inert atmosphere, resorcinol (13.5 mmol), 4,6-dichloropyrimidine (13.5 mmol) and anhydrous DMSO (20 mL) were combined. Upon reaching solution homogeneity, anhydrous K<sub>2</sub>CO<sub>3</sub> (20 grams) was added, and the reaction was immediately placed in an aluminum heating block at 100°C and stirred vigorously for 40 minutes. The reaction was quenched by diluting with DMSO (80 mL) and precipitated in 1 L of distilled water. After stirring to break up large particles, the precipitate was filtered, rinsed with water (300 mL), and acetone (100 mL), and dried under vacuum. <sup>1</sup>H NMR (500 MHz, DMSO-D<sub>6</sub>): δ 8.48-8.42 (1H), 7.55-7.48 (1H), 7.24-7.12 (3H), 6.67-6.61 (1H). <sup>13</sup>C NMR (126 MHz, DMSO-D<sub>6</sub>): δ: 171.4, 158.6, 153.4, 130.9, 119.1, 115.4, 93.5.

#### **Poly(*m*PO) 1e:**

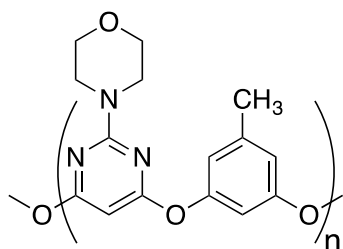

Under an inert atmosphere, orcinol (2.14 mmol, 265 mg), 4-(4,6-Dichloro-2-pyrimidyl)morpholine (2.14 mmol, 0.5 g) and anhydrous DMSO (4 mL) were combined. Upon reaching solution homogeneity, anhydrous K<sub>2</sub>CO<sub>3</sub> (4 grams) was added, and the reaction was immediately placed in an aluminum heating block at 100°C and stirred vigorously for 40 minutes. The reaction was quenched by diluting with DMSO (10 mL) and precipitated in 300 mL of distilled water. After stirring to break up large particles, the precipitate was filtered, rinsed with water (100 mL), and acetone (100 mL), and dried under vacuum. <sup>1</sup>H NMR (500 MHz, CDCl<sub>3</sub>): δ 6.92-6.72 (3H), 5.51-5.37 (1H), 3.66-3.57 (4H), 2.42-2.31 (3H).

#### **Poly(*m*PO) 1f:**

<sup>1</sup> *Macromolecules*, **2009**, 42 (21), 8181–8186

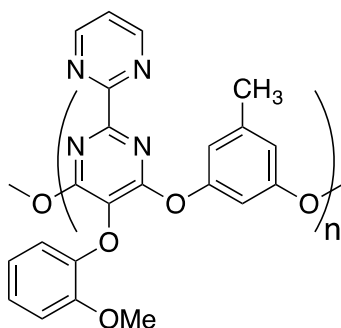

Under an inert atmosphere, orcinol (2.86 mmol, 355.8 mg), 4,6-Dichloro-5-(2-methoxyphenoxy)-2,2'-bipyrimidine (2.866 mmol, 1.0 gram) and anhydrous DMSO (4.25 mL) were combined. Upon reaching solution homogeneity, anhydrous  $K_2CO_3$  (4.25 grams) was added, and the reaction was immediately placed in an aluminum heating block at  $100^\circ C$  and stirred vigorously for 40 minutes. The reaction was quenched by diluting with DMSO (80 mL) and precipitated in 1 L of distilled water. After stirring to break up large particles, the precipitate was filtered, rinsed with water (300 mL), and acetone (100 mL), and dried under vacuum.  $^1H$  NMR (500 MHz,  $CDCl_3$ ):  $\delta$  9.04-8.92 (2H), 7.56-7.49 (1H), 3.66-3.57 (4H), 6.99-6.71 (7H), 3.79-3.71 (3H) 2.29-2.19 (3H).

**Poly(*m*PO) 1g:**

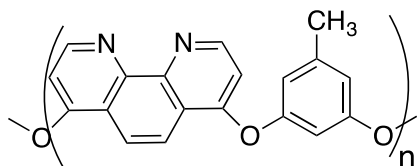

Under an inert atmosphere, orcinol (1 mmol, 124 mg), 4,7-dichloro-1,10-phenanthroline (1 mmol) and anhydrous DMSO (2 mL) were combined. Upon reaching solution homogeneity, anhydrous  $K_2CO_3$  (1.5 grams) was added, and the reaction was immediately placed in an aluminum heating block at  $150^\circ C$  and stirred vigorously for 40 minutes. The reaction was quenched by diluting with DMSO (10 mL) and precipitated in 1 L of distilled water. After stirring to break up large particles, the precipitate was filtered, rinsed with water (100 mL), and acetone (100 mL), and dried under vacuum.  $^1H$  NMR (500 MHz,  $DMSO-D_6$ ):  $\delta$  8.99-8.89 (2H), 8.39-8.29 (2H), 7.22-7.14 (2H), 6.59-6.44 (3H), 2.28-2.25 (3H).

Poly(*m*PO) **1h**

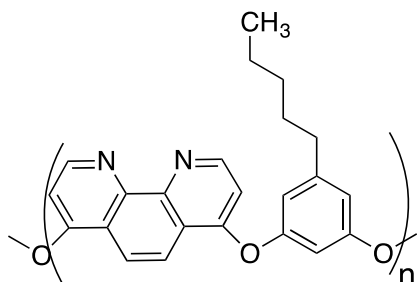

Under an inert atmosphere, olivetol (2 mmol, 360 mg), 4,7-dichloro-1,10-phenanthroline (2 mmol, 496 mg) and anhydrous DMSO (4 mL) were combined. Upon reaching solution homogeneity, anhydrous K<sub>2</sub>CO<sub>3</sub> (3 grams) was added, and the reaction was immediately placed in an aluminum heating block at 150°C and stirred vigorously for 40 minutes. The reaction was quenched by diluting with DMSO (20 mL) and precipitated in 1 L of distilled water. After stirring to break up large particles, the precipitate was filtered, rinsed with water (100 mL), and acetone (100 mL), and dried under vacuum. <sup>1</sup>H NMR (500 MHz, DMSO-D<sub>6</sub>): δ 9.01-8.82 (2H), 8.37-8.17 (2H), 7.30-7.03 (5H), 2.76-2.62 (2), 1.72-1.59 (2H), 1.40-1.21 (4H), 0.91-0.81 (3H).

### Synthesis of Pd@Poly(*m*PO)s:

#### **Pd@Poly(*m*PO) 1a:**

To a 10 mL round bottom, screw-top vial with a stir bar was added **Poly(*m*PO) 1a** (1 mmol of repeat unit, 186 mg) and CHCl<sub>3</sub> (2 mL). The mixture was stirred at 60°C until reaching solution homogeneity, at which point a solution of (NH<sub>4</sub>)<sub>2</sub>PdCl<sub>4</sub> (0.15 mmol, 42 mg) in water (2 mL) was added. The solution was left to stir at 60°C for another 3 hours, then cooled to room temperature, diluted with acetone (4 mL), washed with H<sub>2</sub>O (20 mL), acetone (20 mL), and chloroform (20 mL), and dried under vacuum.

#### **Pd@Poly(*m*PO) 1b:**

To a 10 mL round bottom, screw-top vial with a stir bar was added **Poly(*m*PO) 1b** (1 mmol of repeat unit, 200 mg) and CHCl<sub>3</sub> (2 mL). The mixture was stirred at 60°C until reaching solution homogeneity, at which point a solution of (NH<sub>4</sub>)<sub>2</sub>PdCl<sub>4</sub> (0.15 mmol, 42 mg) in water (2 mL) was added. The solution was left to stir at 60°C for another 3 hours, then cooled to room temperature, diluted with acetone (4 mL), washed with H<sub>2</sub>O (20 mL), acetone (20 mL), and chloroform (20 mL), and dried under vacuum.

#### **Pd@Poly(*m*PO) 1c:**

To a 10 mL round bottom, screw-top vial with a stir bar was added **Poly(*m*PO) 1b** (1 mmol of repeat unit, 256 mg) and CHCl<sub>3</sub> (2 mL). The mixture was stirred at 60°C until reaching solution homogeneity, at which point a solution of (NH<sub>4</sub>)<sub>2</sub>PdCl<sub>4</sub> (0.15 mmol, 42 mg) in water (2 mL) was added. The solution was left to stir at 60°C for another 3 hours, then cooled to room temperature, diluted with acetone (4 mL), washed with H<sub>2</sub>O (20 mL), acetone (20 mL), and chloroform (20 mL), and dried under vacuum.

#### **Pd@Poly(*m*PO) 1d:**

To a 10 mL round bottom, screw-top vial with a stir bar was added **Poly(*m*PO) 1d** (1 mmol of repeat unit, 276.1 mg) and CHCl<sub>3</sub> (2 mL). The mixture was stirred at 60°C until reaching solution homogeneity, at which point a solution of (NH<sub>4</sub>)<sub>2</sub>PdCl<sub>4</sub> (0.15 mmol, 42 mg) in water (2 mL) was added. The solution was left to stir at 60°C for another 3 hours, then cooled to room temperature, diluted with acetone (4 mL), washed with H<sub>2</sub>O (20 mL), acetone (20 mL), and chloroform (20 mL), and dried under vacuum.

#### **Pd@Poly(*m*PO) 1e:**

To a 10 mL round bottom, screw-top vial with a stir bar was added **Poly(*m*PO) 1e** (0.3 mmol of repeat unit, 85.5 mg) and CHCl<sub>3</sub> (2 mL). The mixture was stirred at 60°C until reaching solution homogeneity, at which point a solution of (NH<sub>4</sub>)<sub>2</sub>PdCl<sub>4</sub> (0.045 mmol, 12.78 mg) in water (2 mL) was added. The solution was left to stir at 60°C for another 3

hours, then cooled to room temperature, diluted with acetone (4 mL), washed with H<sub>2</sub>O (20 mL), acetone (20 mL), and chloroform (20 mL), and dried under vacuum.

**Pd@Poly(*m*PO) 1f:**

To a 10 mL round bottom, screw-top vial with a stir bar was added **Poly(*m*PO) 1f** (1 mmol of repeat unit, 384.13 mg) and CHCl<sub>3</sub> (2 mL). The mixture was stirred at 60°C until reaching solution homogeneity, at which point a solution of (NH<sub>4</sub>)<sub>2</sub>PdCl<sub>4</sub> (0.15 mmol, 42.6 mg) in water (2 mL) was added. The solution was left to stir at 60°C for another 3 hours, then cooled to room temperature, diluted with acetone (4 mL), washed with H<sub>2</sub>O (20 mL), acetone (20 mL), and chloroform (20 mL), and dried under vacuum.

**Pd@Poly(*m*PO) 1g:**

To a 10 mL round bottom, screw-top vial with a stir bar was added **Poly(*m*PO) 1g** (1 mmol of repeat unit, 281.3 mg) and CHCl<sub>3</sub> (2 mL). The mixture was stirred at 60°C until reaching solution homogeneity, at which point a solution of (NH<sub>4</sub>)<sub>2</sub>PdCl<sub>4</sub> (0.15 mmol, 42.6 mg) in water (2 mL) was added. The solution was left to stir at 60°C for another 3 hours, then cooled to room temperature, diluted with acetone (4 mL), washed with H<sub>2</sub>O (20 mL), acetone (20 mL), and chloroform (20 mL), and dried under vacuum.

**Pd@Poly(*m*PO) 1h:**

To a 10 mL round bottom, screw-top vial with a stir bar was added **Poly(*m*PO) 1h** (1 mmol of repeat unit, 372 mg) and CHCl<sub>3</sub> (2 mL). The mixture was stirred at 60°C until reaching solution homogeneity, at which point a solution of (NH<sub>4</sub>)<sub>2</sub>PdCl<sub>4</sub> (0.15 mmol, 42 mg) in water (2 mL) was added. The solution was left to stir at 60°C for another 3 hours, then cooled to room temperature, diluted with acetone (4 mL), washed with H<sub>2</sub>O (20 mL), acetone (20 mL), and chloroform (20 mL), and dried under vacuum.

## GPC traces of Poly(*m*PO)s

### **Poly(*m*PO) 1h**

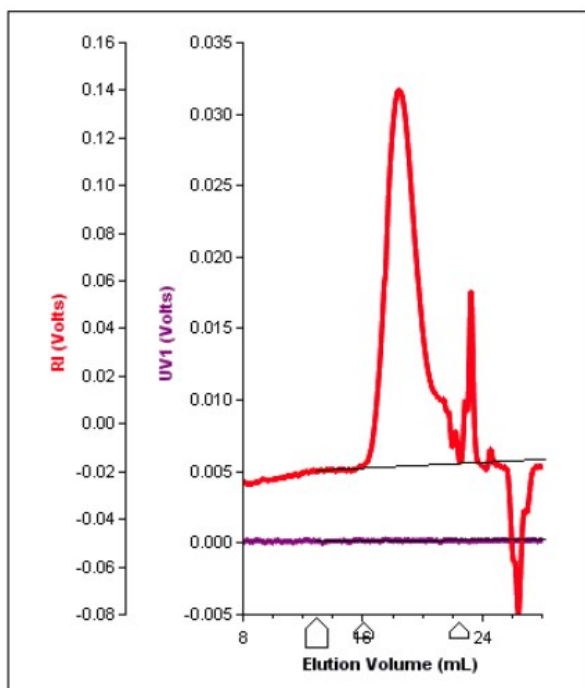

Elution solvent: THF

Calibration Standard: Polystyrene

Temperature: 30°C

Instrument: WGE GPC running on ParSEC Chromatography V. 5.67

Flow rate: 1 mL/min

Mn: 7707      Mw: 20850      Mz: 35260      PDI: 2.7



Poly(*m*PO) **1f**

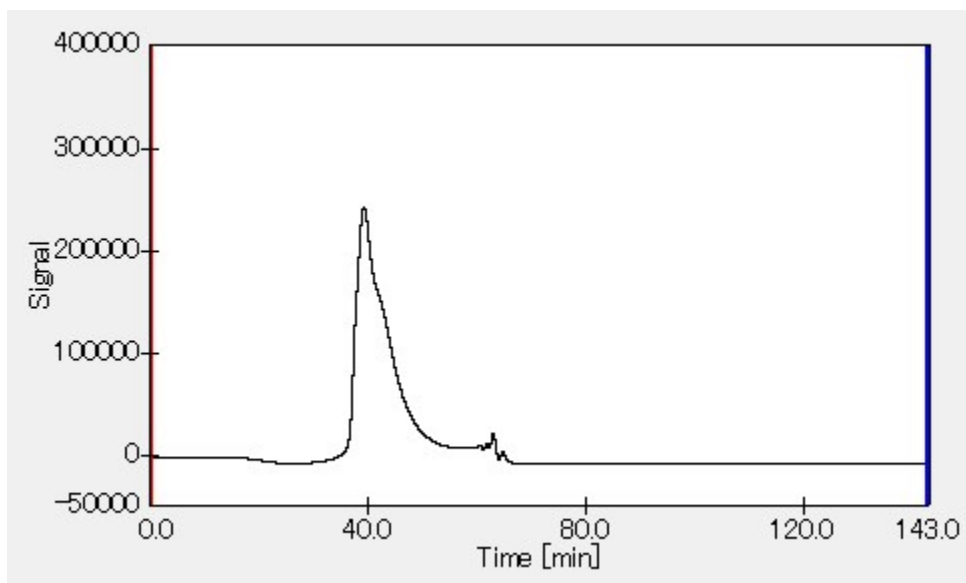

Elution solvent: CHCl<sub>3</sub>

Calibration Standard: Polystyrene

Temperature: 25°C

Instrument: Japan Analytical Industries GPC with one JAIGEL-2.5H and one JAIGEL-3H column in series.

Flow rate: 1 mL/min

Mn: 12360    Mw: 48615    Mz: 48615    PDI: 3.9

## Poly(*m*PO) **1a**

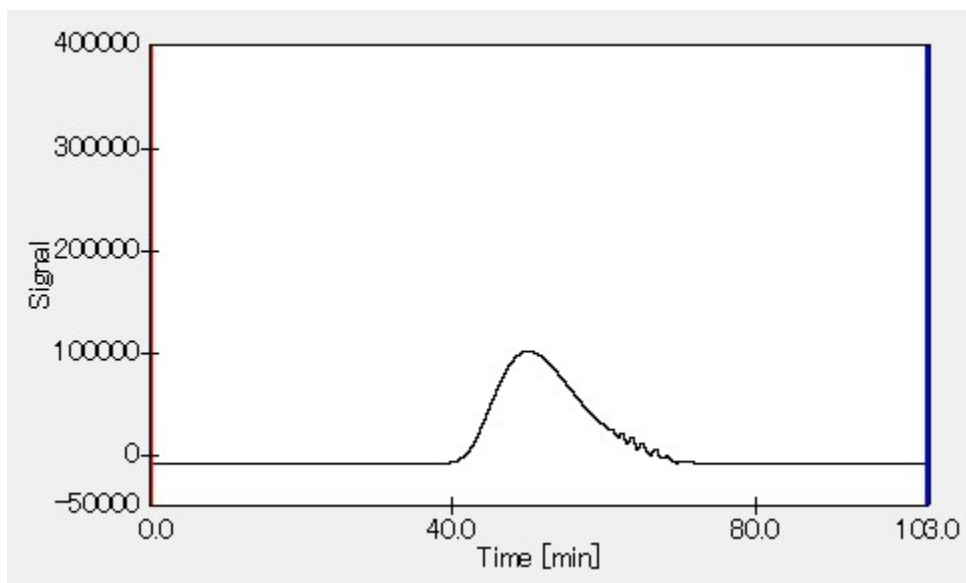

Elution solvent: CHCl<sub>3</sub>

Calibration Standard: Polystyrene

Temperature: 25°C

Instrument: Japan Analytical Industries GPC with one JAIGEL-2.5H and one JAIGEL-3H column in series.

Flow rate: 1 mL/min

Mn: 2337      Mw: 10620      Mz: 15821      PDI: 4.5

## Poly(*m*PO) 1g

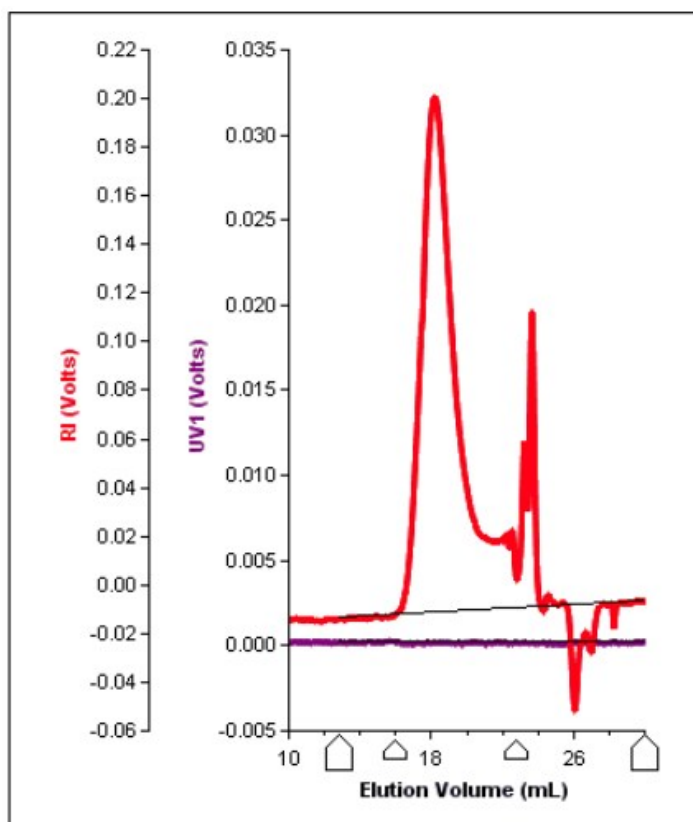

Elution solvent: THF

Calibration Standard: Polystyrene

Temperature: 25°C

Instrument: WGE GPC running on ParSEC Chromatography V. 5.67

Flow rate: 1 mL/min

Mn: 5634      Mw: 22550      Mz: 37070      PDI: 4.0

### LogP Calculations:

Estimates of polymer logP values were calculated using Spartan '14. Representative octamers were geometry optimized using PM3 semiempirical methods. End groups were simplified to H-atoms; analogous structures with –OH and/or –Cl end groups showed little difference in final geometries or LogP values. Optimized LogP values and final geometries for **1a-c** are shown below.

**1a:** (LogP = 6.68)

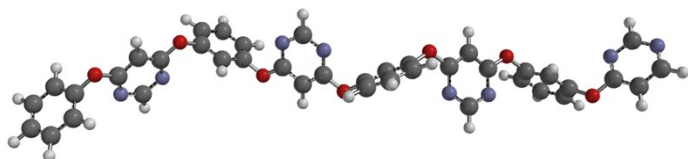

**1b:** (LogP = 8.63)

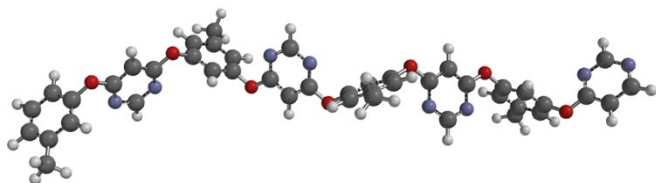

**1c:** (LogP = 15.31)

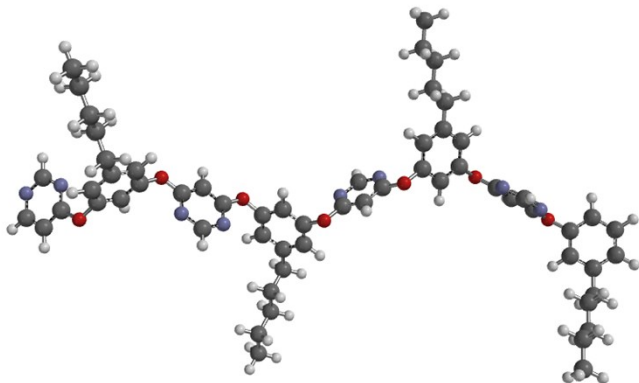

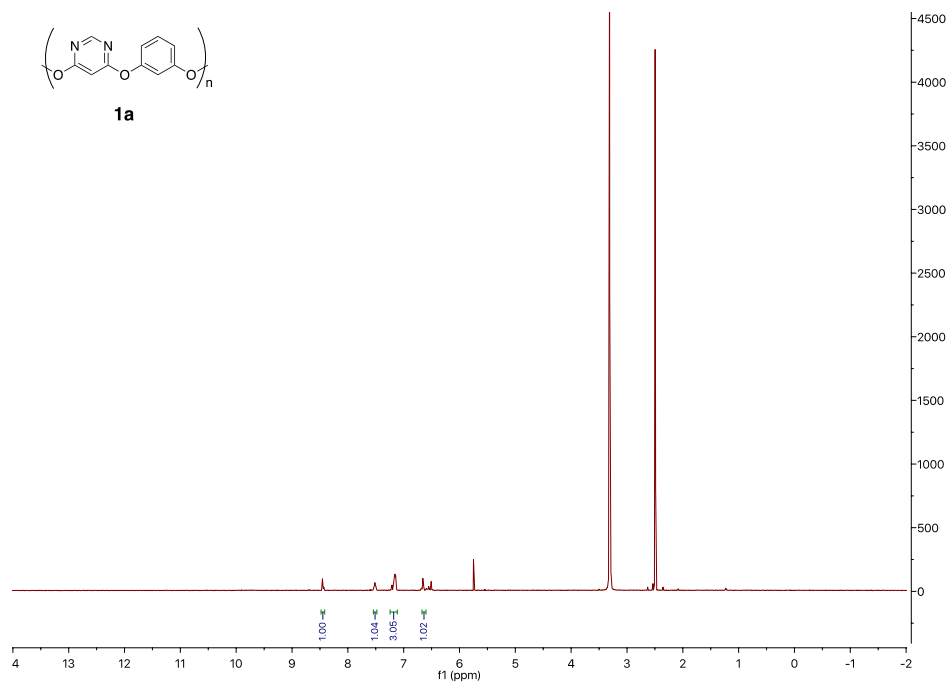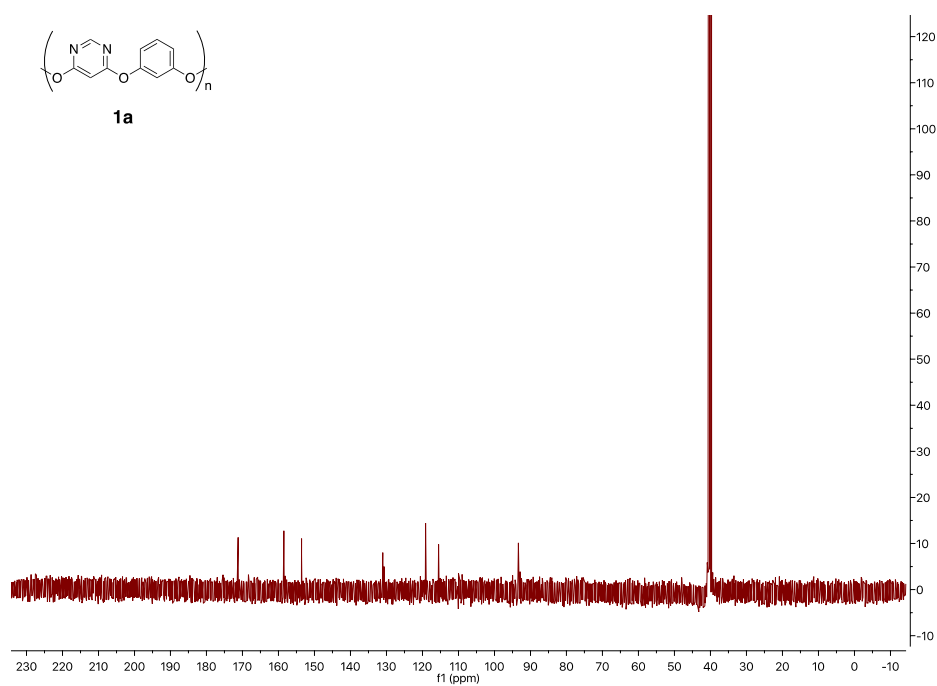

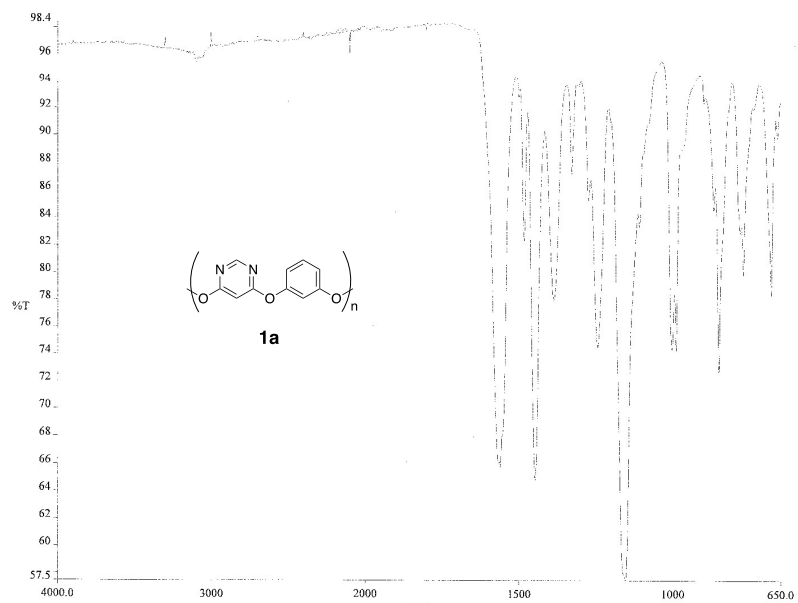

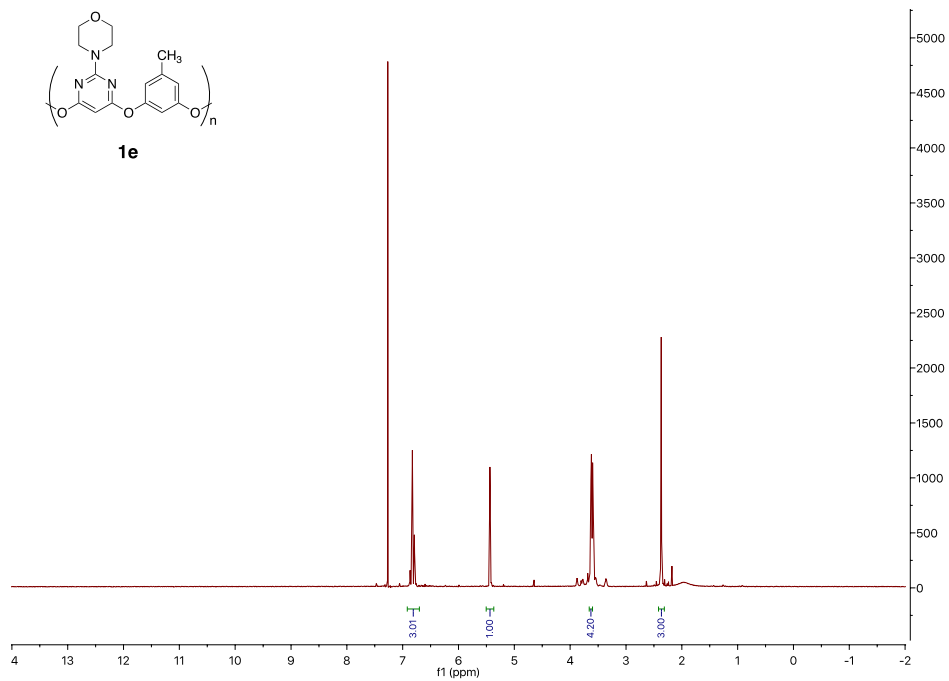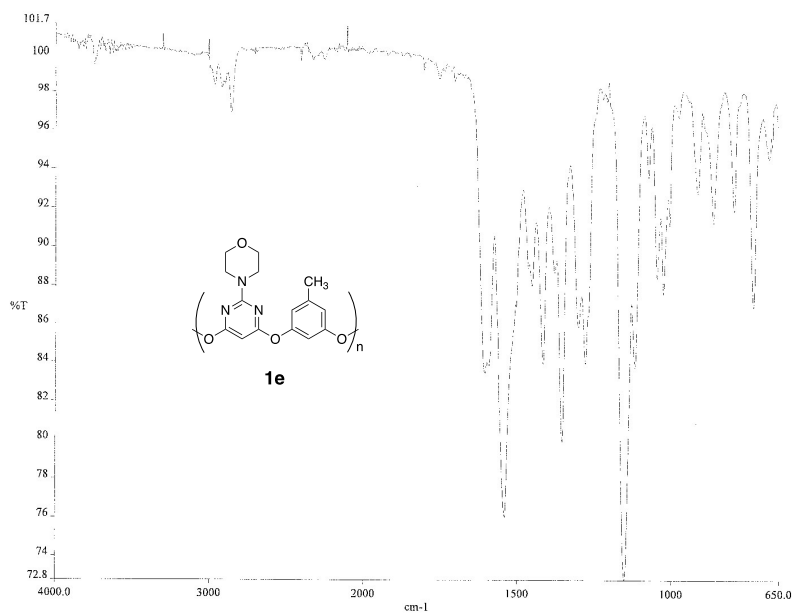

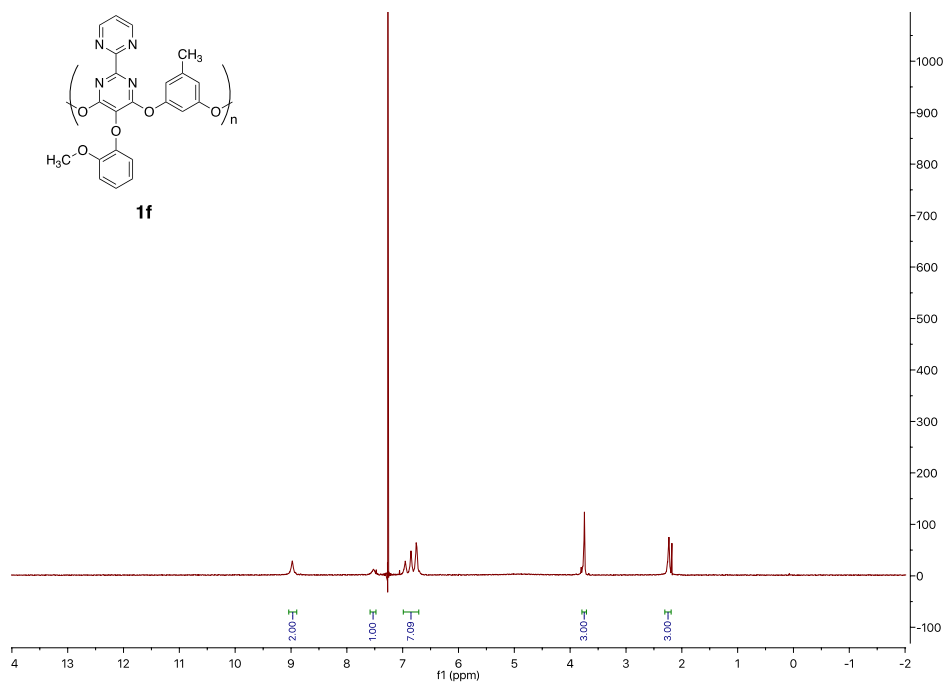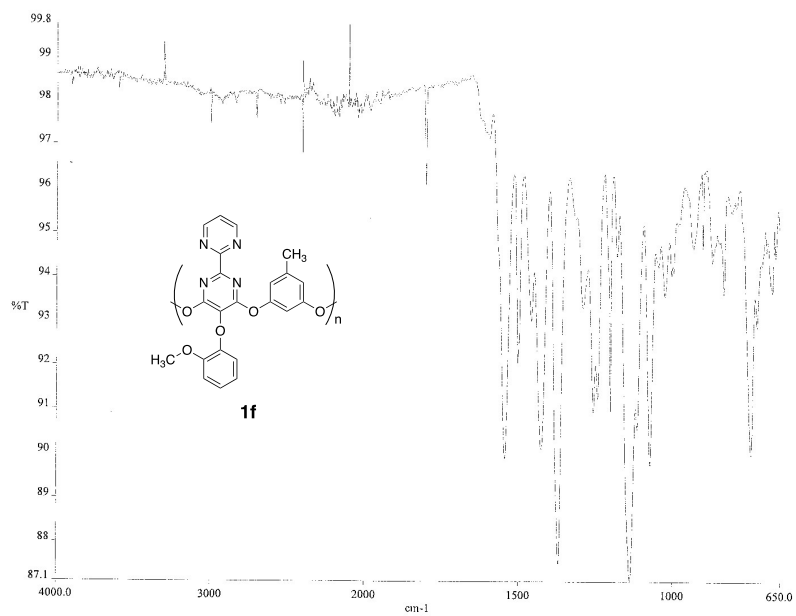



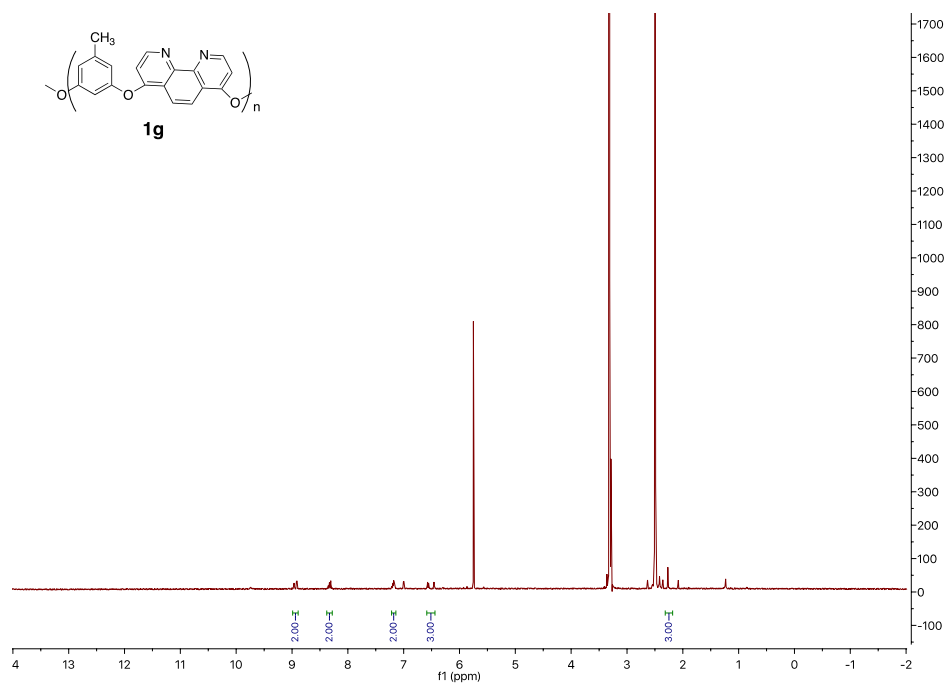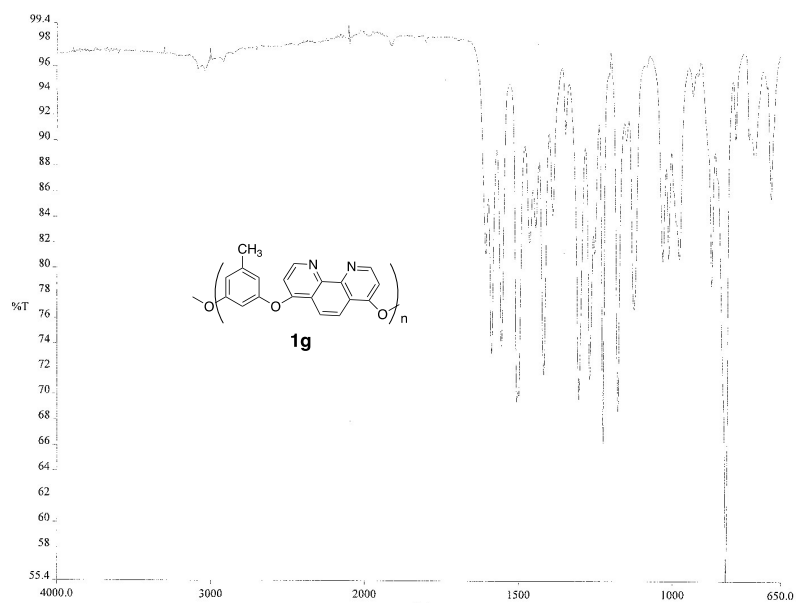

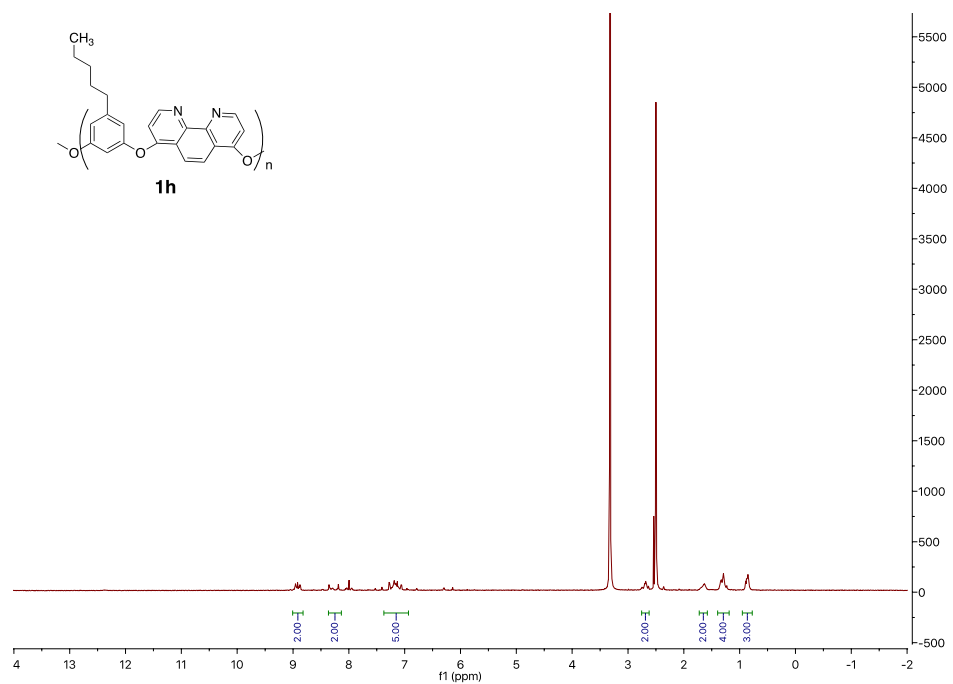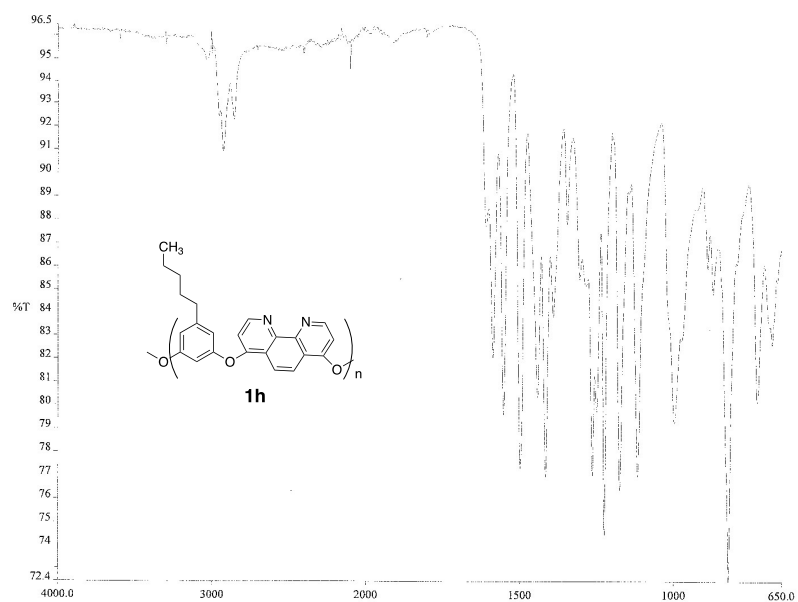

Supplement: c8cc00774h1.pdf [file c8cc00774h1.pdf]
